# Supplementary material for: Evaluating the Implementation and Impact of Harm Reduction Vending Machines in Veterans Supportive Housing Settings: A Mixed-Methods Study Protocol
Source: Research Square preprint supplement (doi:10.21203/rs.3.rs-7209082/v1), 2025-08-20
Supplement: Supplementary file [file 6ce0b0fa7e9ca42425abf98e.pdf]

# Qualitative Interview Guide on Harm Reduction Vending Machines for **Non-Registered Veterans**

## **Reach:**

### **1. How have you heard about the Harm Reduction Vending Machine program?**

Probe: through supportive housing staff, VA staff, Veterans, saw them, fliers, TV advertisements at the VA

- **How well is the Harm Reduction Vending Machine advertised at your housing site?**

Probe: signage on each floor, in elevators, or common areas

Prompt: Is there adequate signage? Should we add additional throughout the building? How else would it be helpful to advertise?

### **2. Why have you not registered for access to the Harm Reduction Vending Machine?**

Probe: lack of interest, unclear registration process, concerns about the items in the machine, already have access through other means (e.g., community-based syringe services program, receive as a prescription, purchase what I need), quality of items in the machine, do not need the items in the machine

- **What would make you interested in registering for access?**

Probe: specific brands, quality, types of items you need or would be interested in

- **How could we improve or increase awareness of the registration process?**

## **Adoption<sup>1</sup>:**

Harm reduction refers to public health programs that reduce the harms related to drug use, without requiring people to stop using drugs. One example is providing naloxone (also called Narcan) to help save someone's life if they overdose on opioids. Another example is offering sterile syringes to people who may inject drugs to prevent infections, like hepatitis C virus and HIV.

---

<sup>1</sup> Adapted from: Wild TC, Koziel J, Anderson-Baron J, Asbridge M, Belle-Isle L, Dell C, Elliott R, Hathaway A, MacPherson D, McBride K, Pauly B, Strike C, Galovan A, Hyshka E. Public support for harm reduction: A population survey of Canadian adults. PLoS One. 2021 May 19;16(5):e0251860. doi: 10.1371/journal.pone.0251860. PMID: 34010338; PMCID: PMC8133460.

There are many different opinions about harm reduction. Many supporters think these programs can significantly reduce death and the transmission of disease among people who use drugs. Supporters also believe that these programs can bring them into contact with health and social services that could help in their recovery journey. Opponents may argue that harm reduction programs encourage crime and drug use and should not be offered.

**3. How would you describe your personal level of support for harm reduction:**

Probe: support or do not support; feel neutral or no opinion

- **How would you describe your personal level of support for distribution of naloxone (Naloxone) for opioid overdose reversal?**

Probe: support or do not support; feel neutral or no opinion

- **How would you describe your personal level of support for distribution of sterile syringes that may be used to inject drugs?**

Probe: support or do not support; feel neutral or no opinion

**4. How comfortable would you be talking to someone who uses illicit drugs?**

Prompt: Would you feel afraid or hesitant to talk to them? What if the person was a friend or family member? Would you feel upset, disturbed, or ashamed?

**5. How would you describe your personal level of support for the harm reduction vending machine?**

Probe: support or do not support; feel neutral or no opinion

Prompt: Do you feel that it belongs in a building where you live?

- **What concerns do you have about the Harm Reduction Vending Machine at your housing site?**

Probe: triggering, increased cravings or drug use, litter

- **What specific items in the Harm Reduction Vending Machine do you have concerns about?**

Visual aid: pictures of items in machine (**Appendix 1**)

Probe: sterile syringes, cookers, tourniquets

- **Are there specific items in the Harm Reduction Vending Machine that you support Veterans having access to?**

Visual aid: pictures of items in machine (**Appendix 1**)

Probe: deodorant, lotion, mouthwash, lip balm, sunscreen

## **Effectiveness:**

**6. What feedback do you have regarding the Harm Reduction Vending Machine location at your housing site?**

Prompt: Is it in an easy or difficult location to access? Does it have adequate privacy or need more privacy? Is the area too crowded or small?

**7. What feedback do you have regarding the Harm Reduction Vending Machine overall appearance?**

Visual aid: picture of machine front and side (**Appendix 2**)

Probe: graphics, contact information, business card holder, colors, logo, attractiveness, appeal

**8. How has having the Harm Reduction Vending Machine at your housing site impacted your routes?**

Probe: improved, had a negative impact, in what ways; no change

Prompt: Do you avoid the area where it is located?

**9. How has having the Harm Reduction Vending Machine at your housing site impacted your quality of life?**

Probe: improved, had a negative impact, in what ways; no change

- **How has having the Harm Reduction Vending Machine at your housing site impacted your living environment?**

Probe: improved, had a negative impact, in what ways; no change

- **How has having the Harm Reduction Vending Machine at your housing site impacted your interactions with Veterans and staff at the housing site?**

Probe: improved, had a negative impact, in what ways; no change

## **Wrap Up (Remaining Time)**

**Is there anything else you would like to share with the research team at this time?**

“I am going to stop recording now.”

“Thank you for your participation in this interview.”

Provide handouts/resources if requested:

- Harm Reduction Vending Machine takeaway card
- Harm Reduction Program business card
- Addiction Recovery Treatment Services pamphlet
- HIV PrEP handout
- Safer injection practices handout
- Overdose education and naloxone handout

## Appendix 1. Harm Reduction Vending Machine Contents.

|                                                                                                                       |                                                                                                                                |                                                                                                                                                |                                                                                                                           |
|-----------------------------------------------------------------------------------------------------------------------|--------------------------------------------------------------------------------------------------------------------------------|------------------------------------------------------------------------------------------------------------------------------------------------|---------------------------------------------------------------------------------------------------------------------------|
| Body lotion<br>                      | Deodorant<br>                                 | Alcohol-free mouthwash<br>                                  | Lip balm<br>                           |
| Hand sanitizer<br>                   | Sunscreen<br>                                 | Hygiene kit<br>                                              | Wound care kit<br>                     |
| Alcohol swabs<br>                    | 1-quart sharps container<br>                  | Personal sized sharps container<br>                          | Latex-free tourniquet<br>              |
| External (penile) latex condoms<br> | XL external (penile) latex condoms<br>       | Water-based lubricant<br>                                   | Ascorbic acid (vitamin C) powder<br> |
| Sterile water vial.<br>            | Test strips to check drugs for fentanyl<br> | Test strips to check drugs for xylazine (AKA Tranq)<br>    | Cooker with a cotton pellet<br>      |
| Rubber mouthpiece<br>              | Safer snorting kit<br>                      | Safer rectal drug use kit (AKA boofing, booty bumping)<br> | <b>27G</b> 16mm 1mL syringes<br>     |
| 12mm 1mL syringes<br>              | 12mm 1mL syringes<br>                       | 12mm 1mL syringes<br>                                      | 8mm 1mL syringes<br>                 |

## Appendix 2. Harm Reduction Vending Machine Pictures.

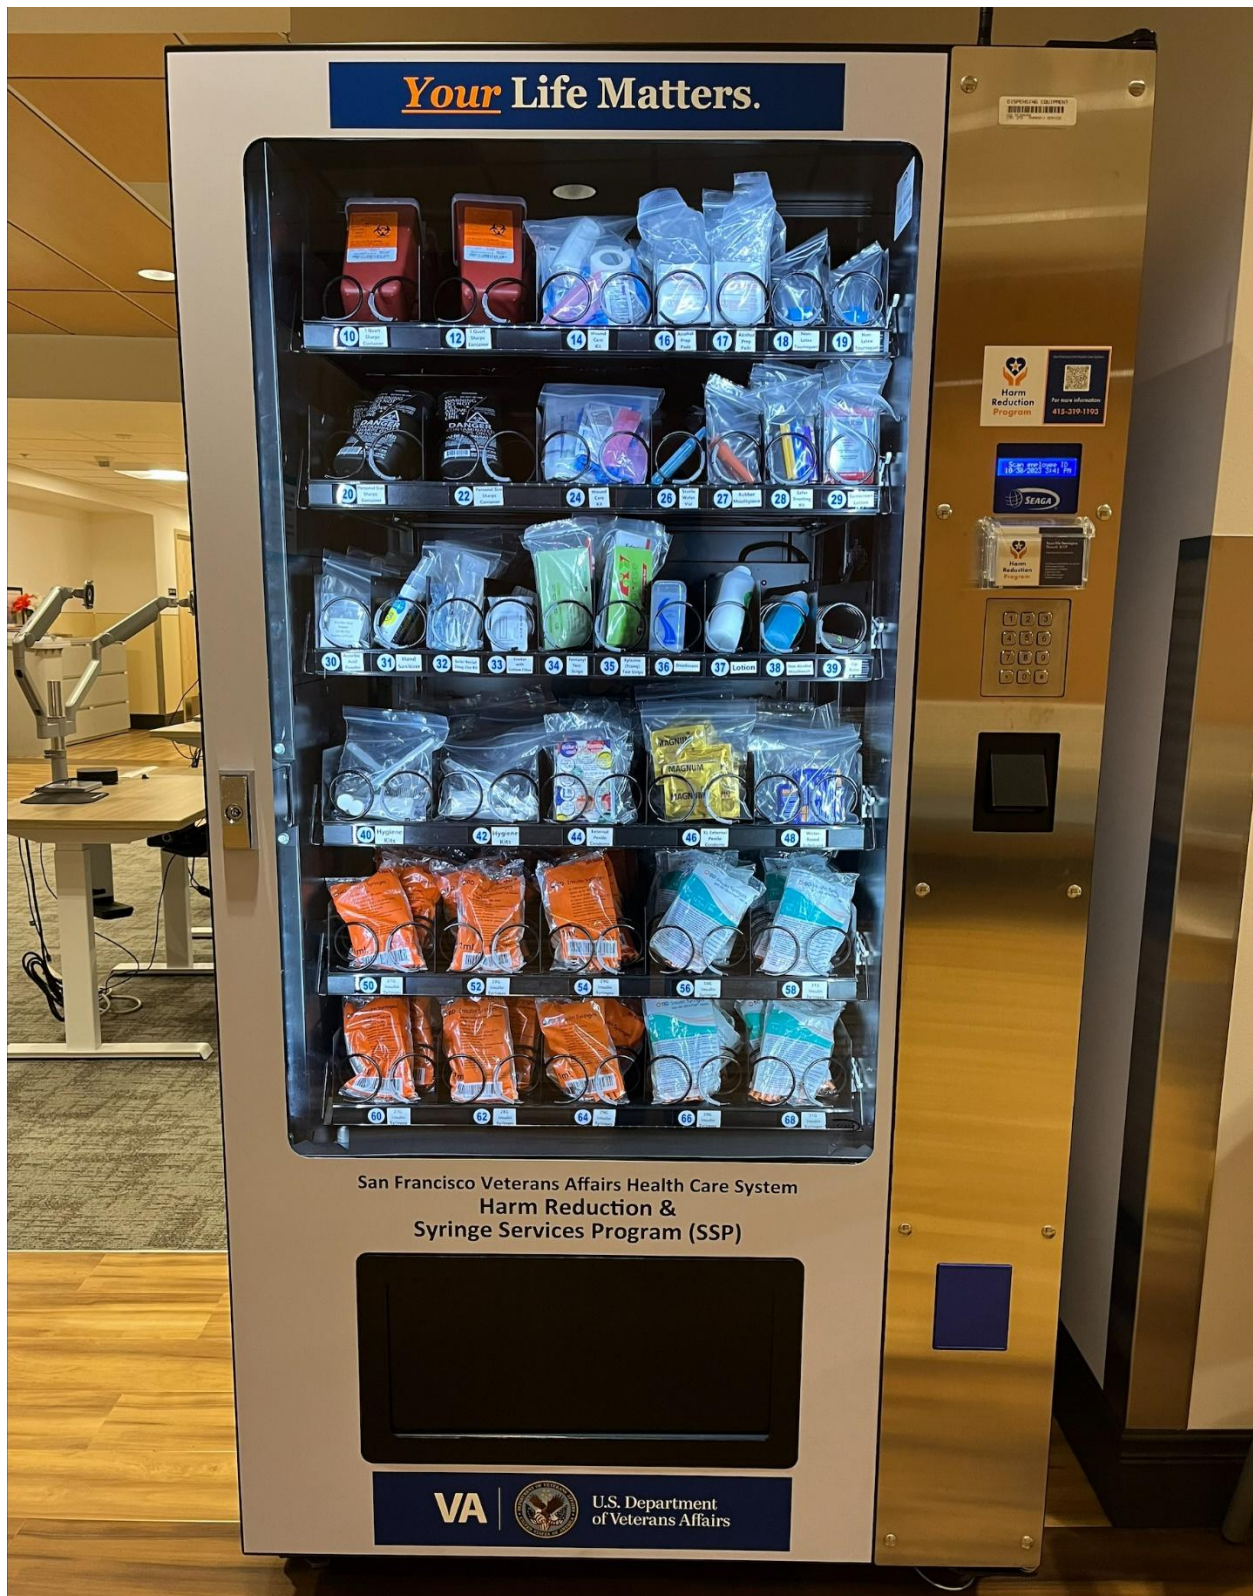

## **Your Life Matters.**

The San Francisco Veterans Affairs Health Care System  
**Harm Reduction & Syringe Services Program (SSP)** wants to protect **you** from:

Drug overdose

Human immunodeficiency virus (HIV)

Hepatitis A, B, C viruses

Skin infections

Sexually transmitted infections (STIs)

Tuberculosis

We have **free** resources for Veterans, such as naloxone (Narcan) to reverse an opioid overdose.

We can also refer Veterans for:

- ✓ **Testing** for infections
- ✓ **Vaccines** to prevent infections like hepatitis A and B
- ✓ **Prevention and treatment** for HIV
- ✓ **Medications and treatment** to reduce drug cravings and use
- ✓ **Medications** to treat skin infections, STIs, and tuberculosis

Contact us today to get connected!

### Pharmacist

Tessa Rife-Pennington  
415-319-1193

### Mental Health Nurse Practitioner

Cedric Thurman  
415-624-7382

Here are some useful VA resources:

- **San Francisco Downtown Clinic:** 401 3<sup>rd</sup> St, San Francisco, CA 94107, 415-281-5100
- **Infectious Disease Clinic:** 415-750-6902
- **Walk-in Mental Health Care:** San Francisco VA Mental Health Clinic, Bldg. 203, ground floor, room GA-28
- **Opioid Treatment Program:** 415-221-4810 x22814 or x22050
- **Intensive Outpatient Program:** 415-221-4810 x23147

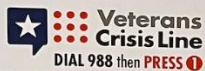

**VA**

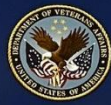

U.S. Department  
of Veterans Affairs
